# Supplementary material
Source: PubMed Central journal article supplement (PMC7965732)
Supplement: 2275_figures.pdf [file 2275_figures.pdf]

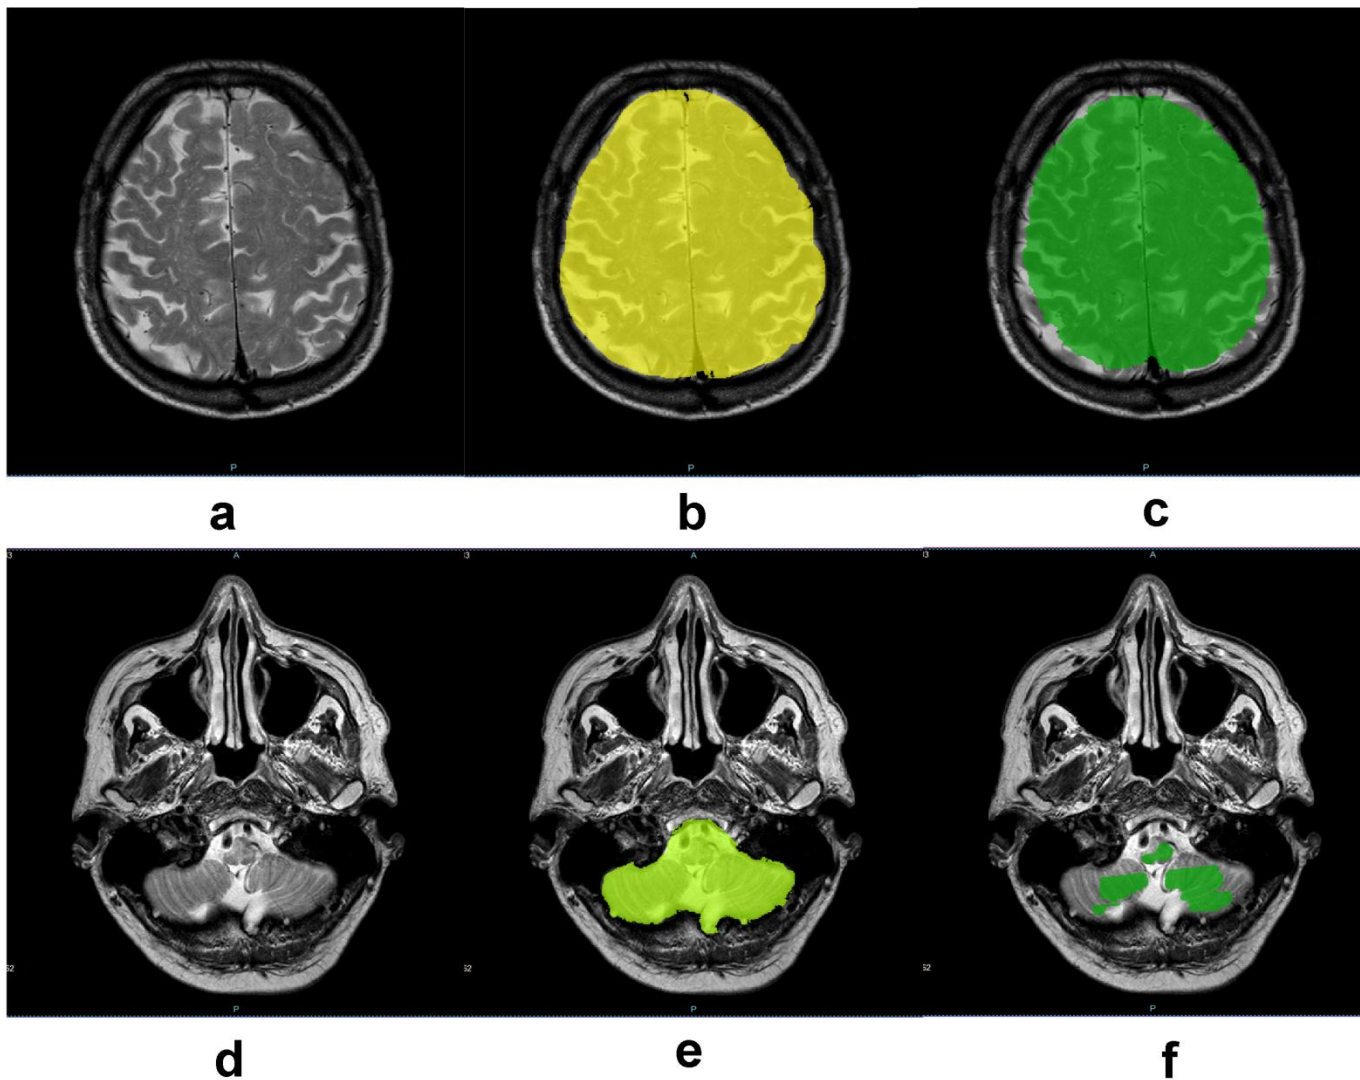

Supplementary Figure 1

Manual (**b** and **e**) and automatic (**c** and **f**) segmentation of brain tissue volume (BTv). The standard segmentation is shown in yellow; the automatic segmentation is shown in green. **c** and **f** illustrate the automatic over and under-estimation of BV, respectively.

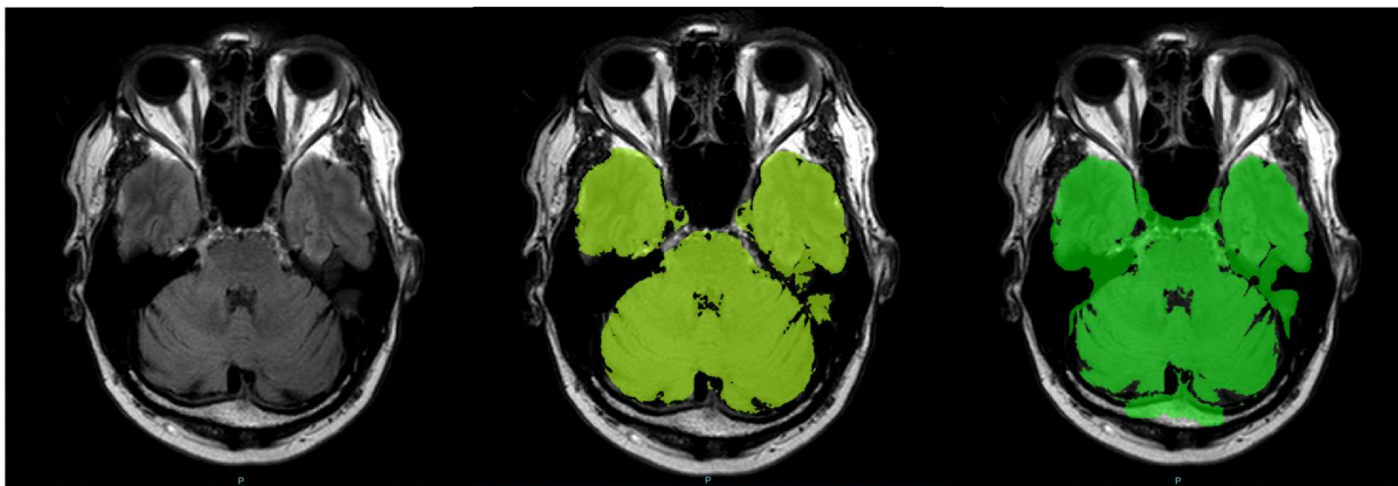

**a**

**b**

**c**

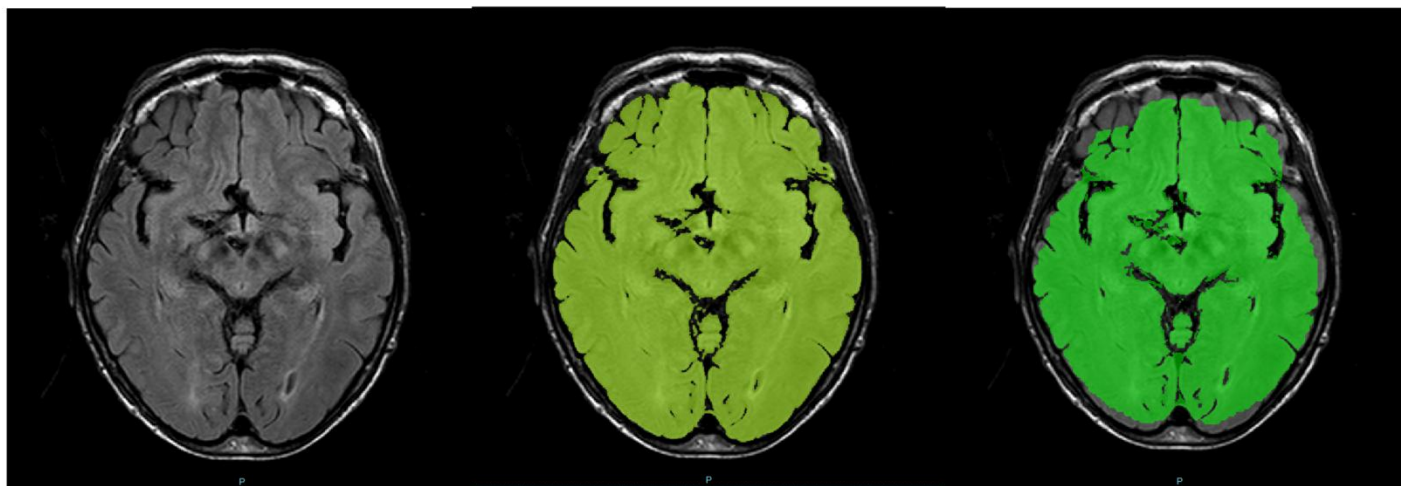

**d**

**e**

**f**

**Supplementary Figure 2**

Manual (**b** and **e**) and automatic (**c** and **f**) segmentation of intracranial volume (ICV). The standard segmentation is shown in yellow; the automatic segmentation is shown in green. **c** and **f** illustrate the automatic under-estimation of ICV.

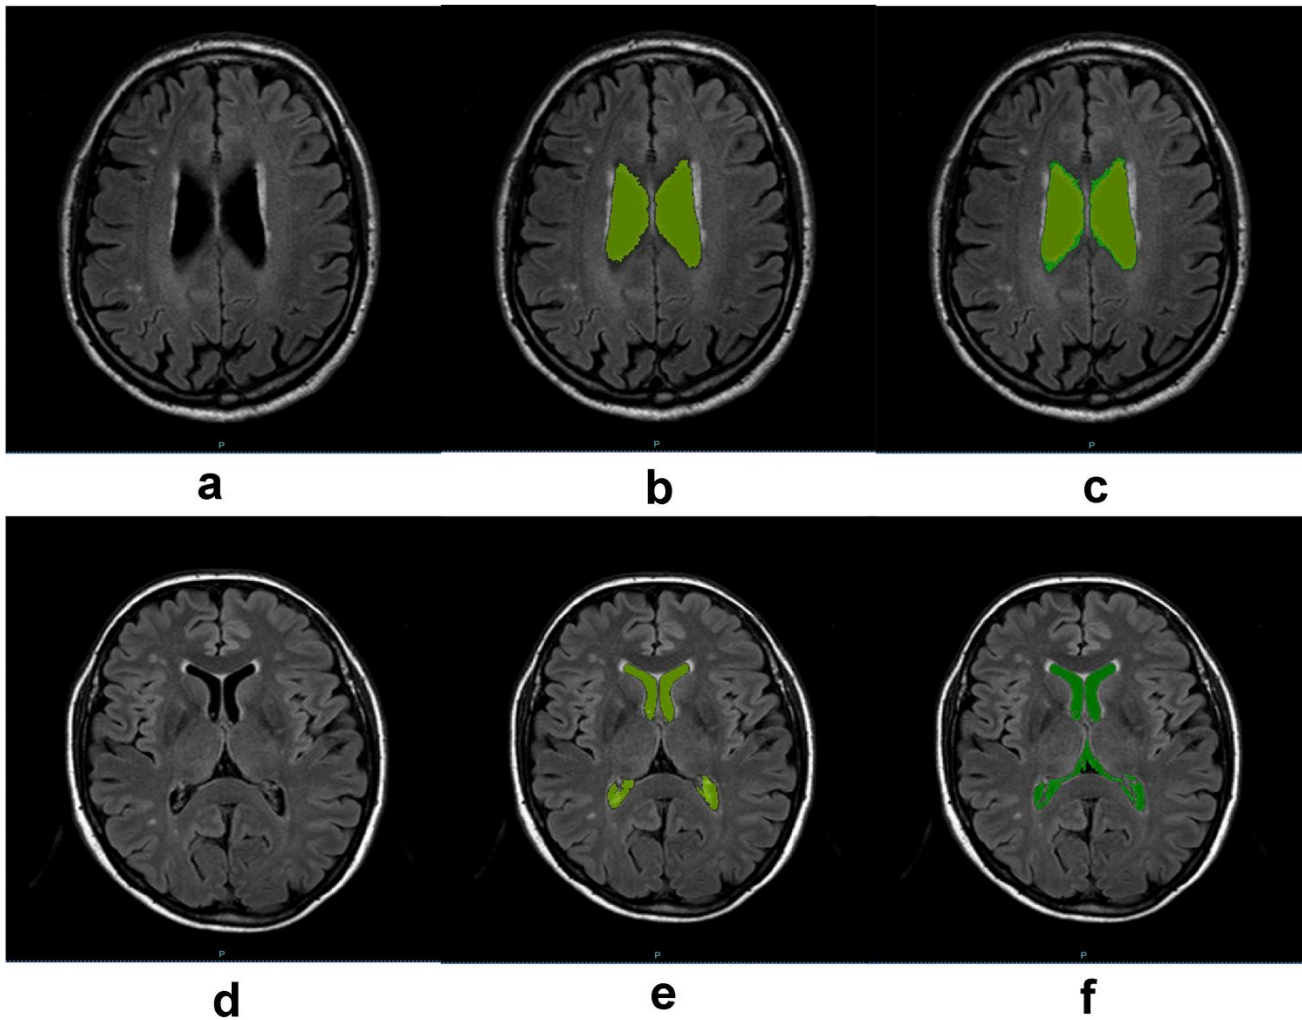

Supplementary Figure 3

Manual (**b**, **e**) and automatic (**c** and **f**) segmentation of ventricular volume (VV). The standard segmentation is shown in yellow; the automatic segmentation is shown in green. **c** and **f** illustrate the automatic overestimation of VV.

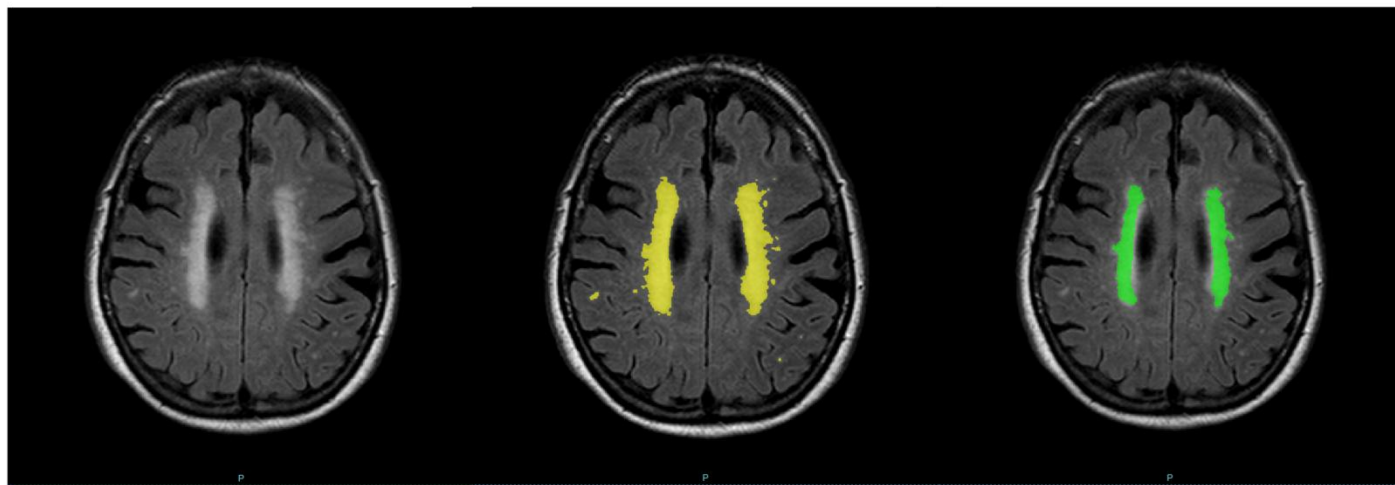

**a**

**b**

**c**

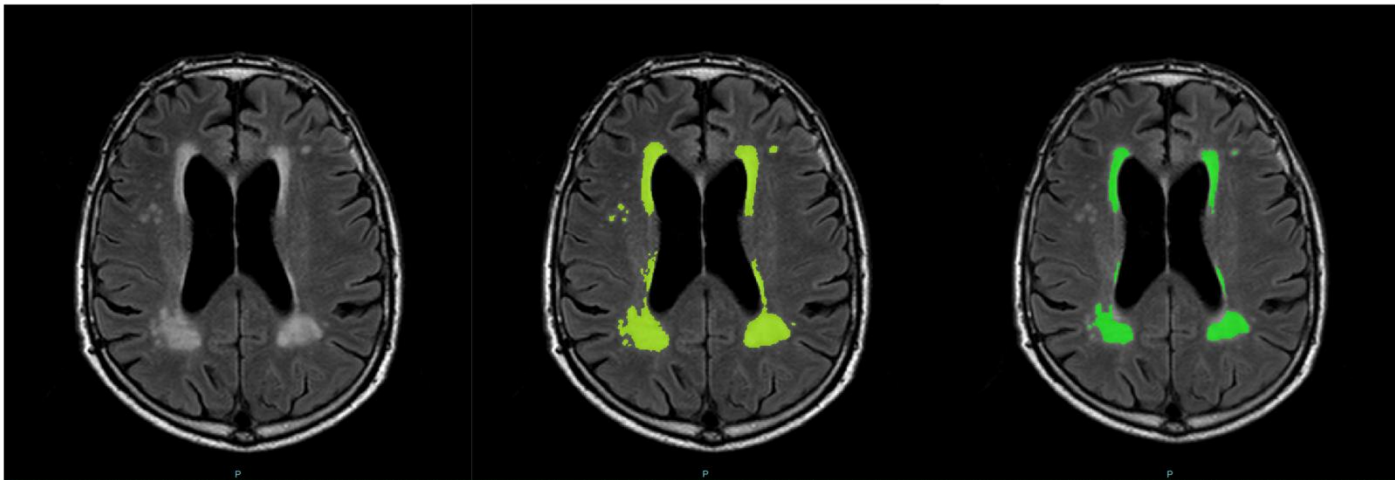

**d**

**e**

**f**

**Supplementary Figure 4**

Manual (**b** and **e**) and automatic (**c** and **f**) segmentation of white matter hyperintensities volume (WMHV). The standard segmentation is shown in yellow; the automatic segmentation is shown in green. **c** and **f** illustrate the automatic under-estimation of WMHV.
